# Supplementary material for: Spray-Dried Formulation of Epicertin, a Recombinant Cholera Toxin B Subunit Variant That Induces Mucosal Healing
Source: MDPI journal article supplement (doi:10.3390/pharmaceutics13040576), 2021-04-18
Supplement: s1 [file s1]

# Supplementary Materials: Spray Dried Formulation of Epicertin, a Recombinant Cholera Toxin B Subunit Variant that Induces Mucosal Healing

Micaela A. Reeves, Joshua M. Royal, David A. Morris, Jessica M. Jurkiewicz, Nobuyuki Matoba and Krystal T. Hamorsky

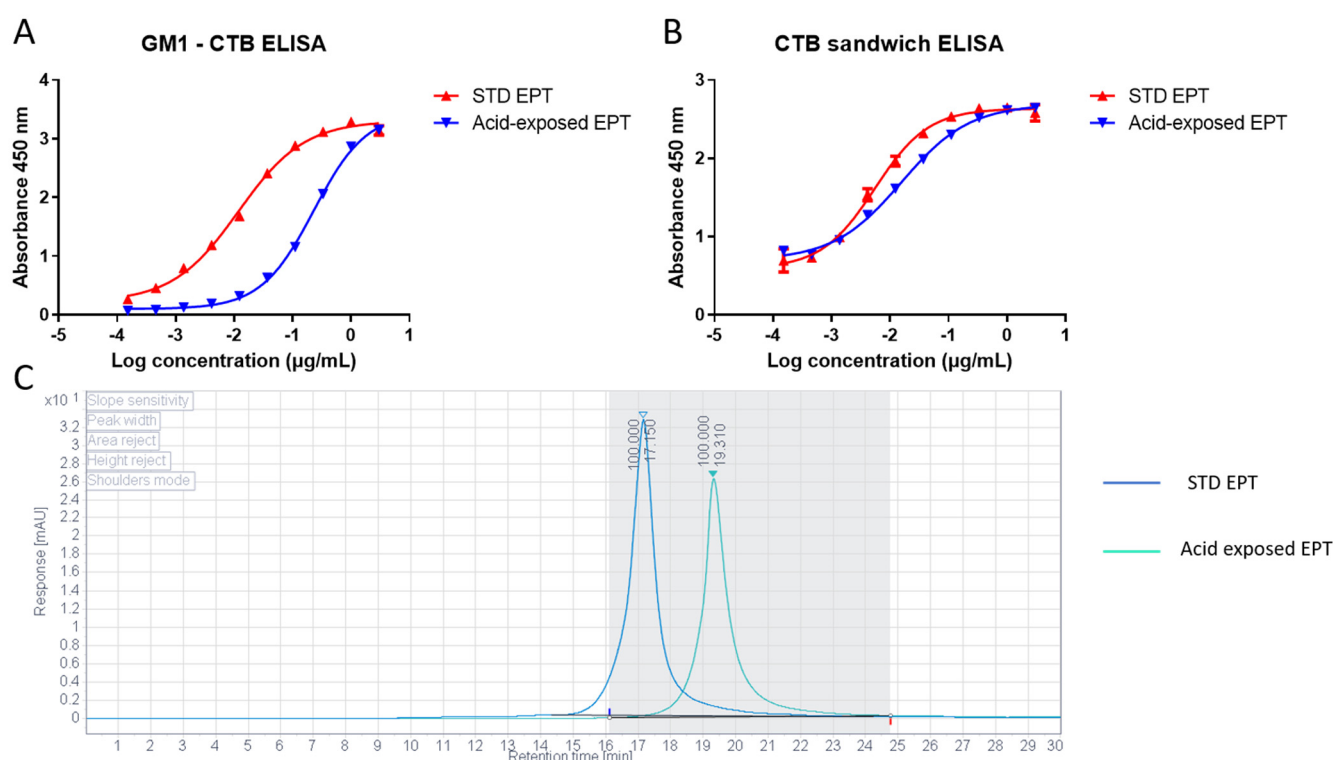

**Figure S1.** Evidence for EPT degradation at pH 1.0. These results demonstrate the need for a pH-dependent oral formulation of EPT. Top left: GM1-CTB ELISA. STD EPT in pentamer has a much higher EC<sub>50</sub> to GM1 than acid-exposed EPT which contains EPT in monomer form. Top right: CTB sandwich ELISA. STD EPT in pentamer form and acid exposed EPT monomer form can be detected in a similar manner demonstrating capacity to detect both GM1-binding pentamer and disassembled CTB molecular species. Bottom: Size Exclusion (SEC)-HPLC. STD EPT elutes in pentamer form at a 17.1 min retention time whereas acid exposed EPT elutes in monomer form at 19.3 min, whereby demonstrating acid dissociates pentamer EPT into monomer EPT.

**Publisher's Note:** MDPI stays neutral with regard to jurisdictional claims in published maps and institutional affiliations.

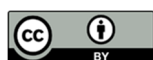

**Copyright:** © 2020 by the authors. Submitted for possible open access publication under the terms and conditions of the Creative Commons Attribution (CC BY) license (<http://creativecommons.org/licenses/by/4.0/>).
